# Supplementary material for: Anemia and Cognitive Performance in the ELSA-Brasil Cohort Baseline
Source: Atypon-hosted journal article supplement (doi:10.1176/appi.neuropsych.19040088), 2019-12-04

**Supplemental Table S1.** Beta-coefficients (95% confidence intervals) for the association between standardized scores in cognitive tests and anemia, restricting the sample to individuals without low body-mass index, low glomerular filtration rate or using antipsychotic, antiparkinsonian or anticonvulsant medications.

|                              | Crude  |        |       | Adjusted model 1 |        |       | Adjusted model 2 |        |       |
|------------------------------|--------|--------|-------|------------------|--------|-------|------------------|--------|-------|
|                              | Beta   | 95% CI |       | Beta             | 95% CI |       | Beta             | 95% CI |       |
|                              |        | LB     | UB    |                  | LB     | UB    |                  | LB     | UB    |
| <b>All sample</b>            |        |        |       |                  |        |       |                  |        |       |
| Global                       | -0.021 | -0.100 | 0.057 | 0.031            | -0.048 | 0.110 | 0.017            | -0.061 | 0.096 |
| Verbal learning              | 0.059  | -0.019 | 0.137 | 0.056            | -0.023 | 0.135 | 0.050            | -0.029 | 0.130 |
| Late recall                  | 0.011  | -0.067 | 0.089 | 0.025            | -0.054 | 0.104 | 0.020            | -0.059 | 0.100 |
| Word recognition             | -0.035 | -0.113 | 0.043 | -0.039           | -0.118 | 0.040 | -0.039           | -0.119 | 0.041 |
| Animal semantic fluency test | -0.036 | -0.114 | 0.042 | 0.017            | -0.062 | 0.096 | 0.003            | -0.076 | 0.082 |
| Trail Making Test, Part B    | -0.065 | -0.143 | 0.013 | 0.037            | -0.041 | 0.115 | 0.021            | -0.057 | 0.099 |
| <b>Men</b>                   |        |        |       |                  |        |       |                  |        |       |
| Global                       | 0.058  | -0.111 | 0.226 | 0.097            | -0.071 | 0.265 | 0.110            | -0.057 | 0.277 |
| Verbal learning              | 0.131  | -0.037 | 0.299 | 0.127            | -0.041 | 0.295 | 0.133            | -0.035 | 0.302 |
| Late recall                  | 0.058  | -0.110 | 0.226 | 0.066            | -0.103 | 0.234 | 0.069            | -0.100 | 0.237 |
| Word recognition             | 0.037  | -0.131 | 0.205 | 0.040            | -0.129 | 0.209 | 0.046            | -0.124 | 0.215 |
| Animal semantic fluency test | -0.030 | -0.198 | 0.138 | 0.009            | -0.159 | 0.178 | 0.018            | -0.150 | 0.186 |
| Trail Making Test, Part B    | -0.015 | -0.183 | 0.153 | 0.062            | -0.105 | 0.229 | 0.081            | -0.085 | 0.247 |
| <b>Women</b>                 |        |        |       |                  |        |       |                  |        |       |
| Global                       | -0.044 | -0.133 | 0.045 | 0.015            | -0.075 | 0.105 | -0.002           | -0.092 | 0.088 |
| Verbal learning              | 0.039  | -0.050 | 0.128 | 0.043            | -0.048 | 0.134 | 0.034            | -0.057 | 0.125 |
| Late recall                  | -0.002 | -0.091 | 0.087 | 0.020            | -0.071 | 0.111 | 0.012            | -0.079 | 0.103 |
| Word recognition             | -0.056 | -0.145 | 0.033 | -0.060           | -0.151 | 0.031 | -0.065           | -0.156 | 0.026 |
| Animal semantic fluency test | -0.039 | -0.128 | 0.050 | 0.014            | -0.076 | 0.104 | 0.000            | -0.090 | 0.090 |
| Trail Making Test, Part B    | -0.080 | -0.169 | 0.008 | 0.030            | -0.059 | 0.119 | 0.013            | -0.075 | 0.101 |

95% CI: 95% confidence interval. LB: Lower bound. UB: Upper bound. Adjusted model 1 is adjusted for race, family income, smoking status, hypertension, diabetes, dyslipidemia, thyroid function and excessive alcohol use. Adjusted model 2 is adjusted for variables included in the adjusted model 1 plus age, sex and years of formal education (to reduce residual confounding), body-mass index, estimated glomerular filtration rate and use of antipsychotic medications, antiparkinsonian agents, and/or anticonvulsants.

**Supplemental Table S2.** Beta-coefficients for the association between global scores and sex-specific hemoglobin quintiles.

|                                      | Crude  |        |       | Adjusted model 1 |        |       | Adjusted model 2 |        |       |
|--------------------------------------|--------|--------|-------|------------------|--------|-------|------------------|--------|-------|
|                                      | Beta   | 95% CI |       | Beta             | 95% CI |       | Beta             | 95% CI |       |
|                                      |        | LB     | UB    |                  | LB     | UB    |                  | LB     | UB    |
| <b>All sample</b>                    |        |        |       |                  |        |       |                  |        |       |
| 1 <sup>st</sup> quintile             | -0.020 | -0.053 | 0.014 | -0.002           | -0.036 | 0.031 | -0.003           | -0.037 | 0.030 |
| 2 <sup>nd</sup> quintile             | -0.001 | -0.035 | 0.033 | 0.001            | -0.032 | 0.035 | 0.003            | -0.030 | 0.037 |
| 3 <sup>rd</sup> quintile (Reference) | 0      |        |       | 0                |        |       | 0                |        |       |
| 4 <sup>th</sup> quintile             | 0.001  | -0.032 | 0.035 | -0.001           | -0.034 | 0.032 | 0.000            | -0.033 | 0.033 |
| 5 <sup>th</sup> quintile             | -0.019 | -0.052 | 0.013 | -0.019           | -0.052 | 0.013 | -0.018           | -0.050 | 0.015 |
| <b>Men</b>                           |        |        |       |                  |        |       |                  |        |       |
| 1 <sup>st</sup> quintile             | -0.016 | -0.067 | 0.034 | -0.007           | -0.057 | 0.044 | 0.002            | -0.048 | 0.052 |
| 2 <sup>nd</sup> quintile             | 0.009  | -0.041 | 0.059 | 0.009            | -0.041 | 0.059 | 0.014            | -0.036 | 0.063 |
| 3 <sup>rd</sup> quintile (Reference) | 0      |        |       | 0                |        |       | 0                |        |       |
| 4 <sup>th</sup> quintile             | -0.010 | -0.060 | 0.040 | -0.015           | -0.065 | 0.035 | -0.017           | -0.067 | 0.033 |
| 5 <sup>th</sup> quintile             | -0.041 | -0.091 | 0.009 | -0.036           | -0.086 | 0.014 | -0.036           | -0.086 | 0.014 |
| <b>Women</b>                         |        |        |       |                  |        |       |                  |        |       |
| 1 <sup>st</sup> quintile             | -0.024 | -0.069 | 0.021 | 0.003            | -0.043 | 0.048 | -0.006           | -0.051 | 0.039 |
| 2 <sup>nd</sup> quintile             | -0.011 | -0.057 | 0.035 | -0.004           | -0.050 | 0.042 | -0.006           | -0.052 | 0.040 |
| 3 <sup>rd</sup> quintile (Reference) | 0      |        |       | 0                |        |       | 0                |        |       |
| 4 <sup>th</sup> quintile             | 0.011  | -0.034 | 0.055 | 0.011            | -0.033 | 0.056 | 0.014            | -0.030 | 0.058 |
| 5 <sup>th</sup> quintile             | -0.003 | -0.046 | 0.041 | -0.007           | -0.051 | 0.036 | -0.004           | -0.047 | 0.039 |

95% CI: 95% confidence interval. LB: Lower bound. UB: Upper bound. Adjusted model 1 is adjusted for race, family income, smoking status, hypertension, diabetes, dyslipidemia, thyroid function and excessive alcohol use. Adjusted model 2 is adjusted for variables included in the adjusted model 1 plus age, sex and years of formal education (to reduce residual confounding), body-mass index, estimated glomerular filtration rate and use of antipsychotic medications, antiparkinsonian agents, and/or anticonvulsants.

**Supplemental Table S3.** Beta-coefficients for the association between global cognition z-scores and anemia or sex-specific hemoglobin quintiles (defined by the distribution of normal hemoglobin levels).

|                                                            | Crude  |        |       | Adjusted model 1 |        |       | Adjusted model 2 |        |       |
|------------------------------------------------------------|--------|--------|-------|------------------|--------|-------|------------------|--------|-------|
|                                                            | Beta   | 95% CI |       | Beta             | 95% CI |       | Beta             | 95% CI |       |
|                                                            |        | LB     | UB    |                  | LB     | UB    |                  | LB     | UB    |
| <b>All sample</b>                                          |        |        |       |                  |        |       |                  |        |       |
| Anemia                                                     | -0.038 | -0.090 | 0.014 | -0.002           | -0.054 | 0.050 | -0.010           | -0.062 | 0.041 |
| 1 <sup>st</sup> quintile (within normal levels)            | -0.027 | -0.061 | 0.007 | -0.015           | -0.049 | 0.020 | -0.016           | -0.050 | 0.018 |
| 2 <sup>nd</sup> quintile (within normal levels)            | 0.003  | -0.031 | 0.038 | 0.006            | -0.028 | 0.041 | 0.008            | -0.026 | 0.042 |
| 3 <sup>rd</sup> quintile (within normal levels; Reference) | 0      |        |       | 0                |        |       | 0                |        |       |
| 4 <sup>th</sup> quintile (within normal levels)            | 0.002  | -0.031 | 0.036 | 0.002            | -0.032 | 0.035 | 0.001            | -0.032 | 0.034 |
| 5 <sup>th</sup> quintile (within normal levels)            | -0.026 | -0.060 | 0.007 | -0.025           | -0.059 | 0.008 | -0.024           | -0.057 | 0.009 |
| <b>Men</b>                                                 |        |        |       |                  |        |       |                  |        |       |
| Anemia                                                     | -0.001 | -0.105 | 0.104 | 0.026            | -0.079 | 0.130 | 0.039            | -0.065 | 0.143 |
| 1 <sup>st</sup> quintile (within normal levels)            | -0.018 | -0.071 | 0.034 | -0.011           | -0.064 | 0.041 | -0.004           | -0.056 | 0.048 |
| 2 <sup>nd</sup> quintile (within normal levels)            | 0.009  | -0.041 | 0.059 | 0.009            | -0.041 | 0.059 | 0.014            | -0.036 | 0.063 |
| 3 <sup>rd</sup> quintile (within normal levels; Reference) | 0      |        |       | 0                |        |       | 0                |        |       |
| 4 <sup>th</sup> quintile (within normal levels)            | -0.010 | -0.060 | 0.040 | -0.015           | -0.065 | 0.035 | -0.017           | -0.067 | 0.032 |
| 5 <sup>th</sup> quintile (within normal levels)            | -0.041 | -0.091 | 0.009 | -0.036           | -0.086 | 0.014 | -0.036           | -0.086 | 0.014 |
| <b>Women</b>                                               |        |        |       |                  |        |       |                  |        |       |
| Anemia                                                     | -0.048 | -0.109 | 0.012 | -0.007           | -0.068 | 0.055 | -0.019           | -0.080 | 0.042 |
| 1 <sup>st</sup> quintile (within normal levels)            | -0.034 | -0.079 | 0.012 | -0.016           | -0.061 | 0.030 | -0.023           | -0.069 | 0.022 |
| 2 <sup>nd</sup> quintile (within normal levels)            | -0.003 | -0.051 | 0.045 | 0.006            | -0.042 | 0.054 | 0.002            | -0.046 | 0.049 |
| 3 <sup>rd</sup> quintile (within normal levels; Reference) | 0      |        |       | 0                |        |       | 0                |        |       |
| 4 <sup>th</sup> quintile (within normal levels)            | 0.014  | -0.032 | 0.059 | 0.018            | -0.028 | 0.063 | 0.017            | -0.028 | 0.062 |
| 5 <sup>th</sup> quintile (within normal levels)            | -0.013 | -0.058 | 0.031 | -0.016           | -0.060 | 0.029 | -0.014           | -0.058 | 0.031 |

95% CI: 95% confidence interval. LB: Lower bound. UB: Upper bound. Adjusted model 1 is adjusted for race, family income, smoking status, hypertension, diabetes, dyslipidemia, thyroid function and excessive alcohol use. Adjusted model 2 is adjusted for variables included in the adjusted model 1 plus age, sex and years of formal education (to reduce residual confounding), body-mass index, estimated glomerular filtration rate and use of antipsychotic medications, antiparkinsonian agents, and/or anticonvulsants.

# Supplemental Figure S1

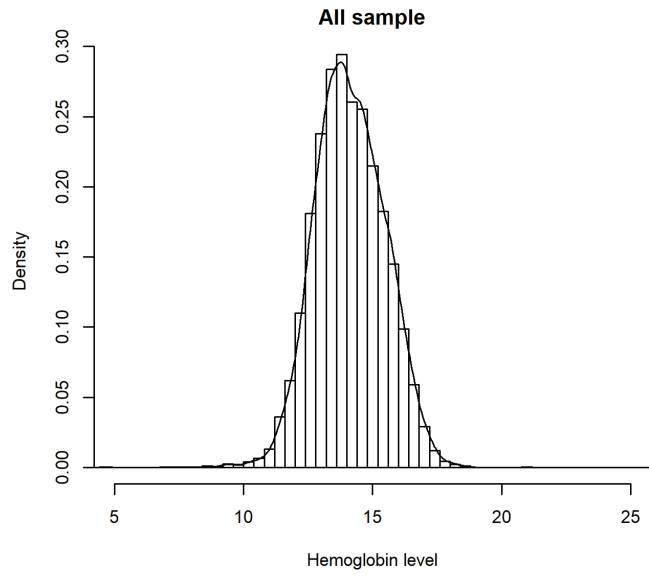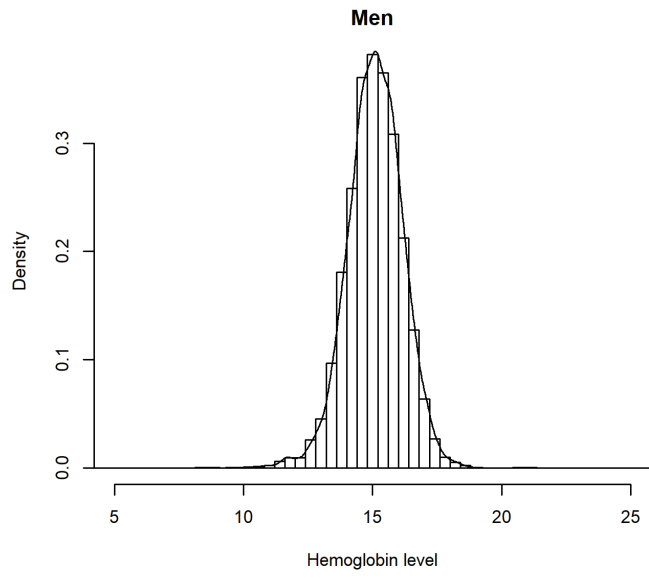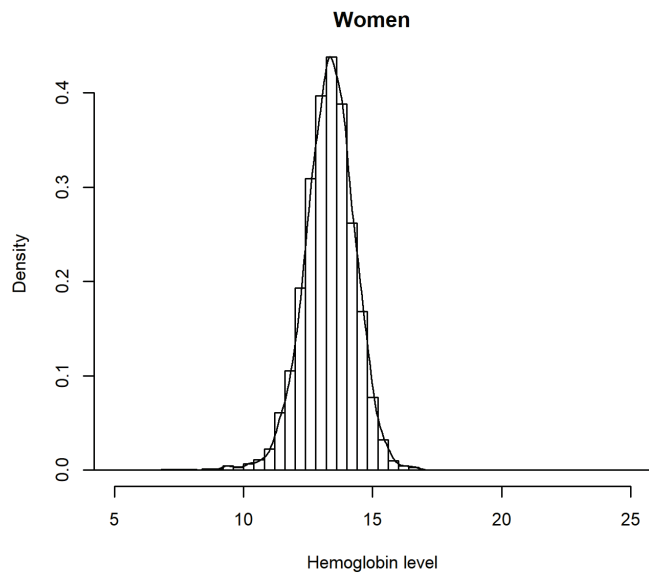

## Supplemental Figure S2

### All sample

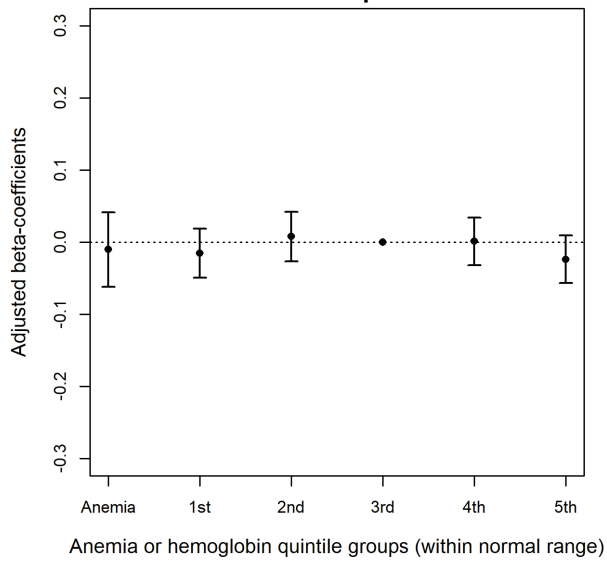

### Men

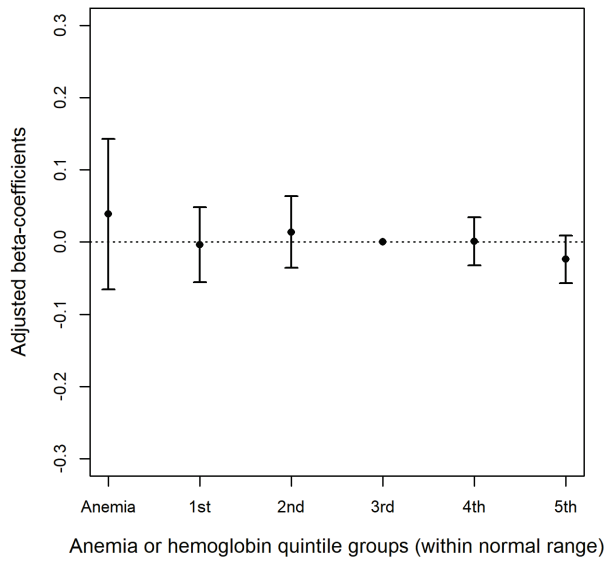

### Women

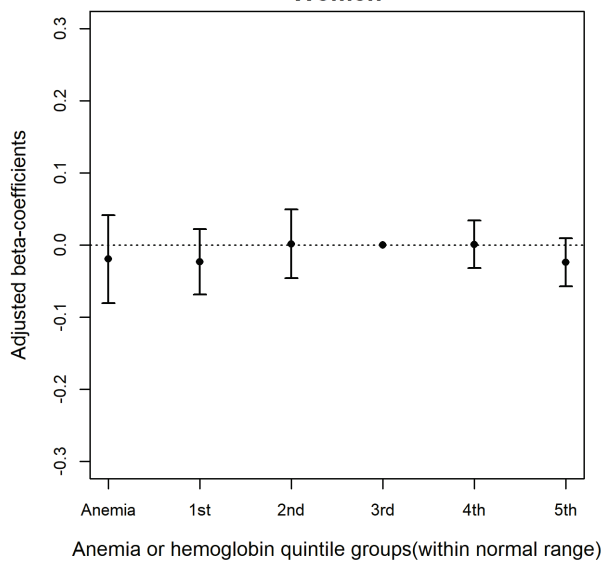

Supplement: appi.neuropsych.19040088.ds001.pdf [file appi.neuropsych.19040088.ds001.pdf]
